# Supplementary material for: Co-inoculation of mycorrhizal fungi and plant growth-promoting rhizobacteria improve growth, biochemical and physiological attributes in Dracocephalum kotschyi Boiss. under water deficit stress
Source: PeerJ. 2023 Nov 28;11:e16474. doi: 10.7717/peerj.16474 (PMC10691354; doi:10.7717/peerj.16474)
Supplement: Data S1 [file peerj-11-16474-s001.xlsx]

## Sheet: Sheet1
rep	Irrigation	Fertilizer	Interaction	Plant height (cm)	lateral branch number	Leaf number	Plant fresh weight (g)	Plant dry weight(g)	Root length (cm)	Root fresh weigh (g)	Root dry weight (g)	Root volume (cm3)	Root surface area (cm2)	RWC (%)	Chlorophyll b (mg/g FW)	Chlorophyll a (mg/g FW)	Carotenoids	Soluble sugars content (mg g–1) FW)	Proline (µmol/ g–1) FW)	Essential oil (%)	Essential oil yield
1	1	1	11	64	16	184	7.6681	1.74713	37	1.3185	0.16275	1.2	24.4023	79.538	0.247	0.582	19.5686	3.0515	12.5708	0.768	7.6681
1	1	2	12	62	13	175	6.65968	1.37852	34	1.1124	0.13	1.2	22.6373	81.1606	0.247601	0.415054	17.9795	2.3565	12.8938	0.6144	6.65968
1	1	3	13	60	14	180	6.9883	1.53497	38	1.25475	0.16025	1.025	22.1181	88.1007	0.197135	0.471504	18.0844	2.5165	10.9131	0.6192	6.9883
1	1	4	14	56	14	165	7.24405	1.63974	35	0.9712	0.1008	0.983333	19.8802	72.2715	0.212217	0.48294	19.0889	2.3965	10.6641	0.5712	7.24405
1	2	1	21	62	15	172	6.5041	1.27292	32	0.95575	0.1014	0.89	18.9132	81.9717	0.22462	0.555437	21.7824	3.4665	14.9849	1.2222	6.5041
1	2	2	22	53	13	156	5.56985	1.36235	27	0.7415	0.0795	0.833333	16.8107	75.1469	0.204959	0.469565	18.8187	2.8265	13.3819	0.89064	5.56985
1	2	3	23	58	15	156	5.16642	1.23599	30	0.866667	0.098	0.8	17.362	80.8036	0.197134	0.579468	20.0964	3.4465	13.9993	0.837	5.16642
1	2	4	24	49	11	140	4.653	1.44075	25	0.5186	0.0692	0.65	14.2864	64.5592	0.157907	0.420743	23.4541	2.0124	12.1379	0.765	4.653
1	3	1	31	59	13	155	4.0355	1.38665	27	0.828667	0.0714662	0.666667	15.036	72.0513	0.203995	0.545012	21.8904	4.98615	18.7602	0.5922	4.0355
1	3	2	32	43	10	115	3.3195	0.997287	20	0.60775	0.0669638	0.5	11.2071	73.4341	0.19536	0.440179	19.8282	3.93065	13.3245	0.4984	3.3195
1	3	3	33	46	14	126	3.95	1.32955	23	0.703833	0.0719061	0.666667	13.8776	68.3784	0.195761	0.438853	21.4541	4.2584	16.822	0.5096	3.95
1	3	4	34	36	8	98	2.18725	0.80405	19	0.4175	0.0607601	0.375	10.6468	62.9144	0.142179	0.266005	24.2559	2.6915	10.764	0.385	2.18725
2	1	1	11	65	14	189	7.5174	1.62426	38	1.34533	0.174	1.43	26.8036	85.9177	0.238719	0.583881	18.7185	3.165	12.4984	0.6192	7.5174
2	1	2	12	63	15	170	6.8838	1.69953	35	1.074	0.112	1	20.9666	82.738	0.220439	0.541941	18.1892	2.5115	10.6403	0.5984	6.8838
2	1	3	13	65	15	186	7.17338	1.63768	37	1.14525	0.13535	1.275	24.3417	84.1794	0.219104	0.476063	19.3654	2.4315	11.9562	0.6864	7.17338
2	1	4	14	56	15	176	6.43335	1.47348	34	1.2008	0.1168	0.99	20.4953	73.922	0.197006	0.452277	20.2693	2.2465	11.0775	0.6432	6.43335
2	2	1	21	60	13	176	6.67288	1.51657	33	0.936083	0.0935	0.9	19.314	83.2277	0.211193	0.631433	20.5314	3.819	16.5978	1.04184	6.67288
2	2	2	22	51	12	160	5.12022	1.24635	28	0.966	0.081	0.75	16.2407	74.6121	0.185019	0.586673	20.6492	3.2815	12.3267	0.7776	5.12022
2	2	3	23	52	14	164	6.55765	1.62539	32	0.898667	0.0946667	0.8	17.9314	73.4	0.190311	0.505492	19.9927	3.3015	14.1069	0.86184	6.55765
2	2	4	24	48	12	150	4.5727	1.23436	24	0.697	0.0785	0.516667	12.4797	69.7595	0.140714	0.417929	22.738	2.18075	12.1329	0.7506	4.5727
2	3	1	31	50	12	144	4.369	1.5119	30	0.6244	0.0700519	0.766667	16.9965	82.3695	0.197394	0.496922	20.3528	4.78365	17.5111	0.5334	4.369
2	3	2	32	42	9	105	3.6385	1.10965	28	0.597688	0.0639294	0.733333	16.0592	74.0196	0.165277	0.514838	20.2303	3.67215	15.9463	0.5208	3.6385
2	3	3	33	45	11	133	3.824	1.21978	26	0.665	0.0623677	0.666667	14.7549	80.2875	0.189219	0.527528	20.738	4.01415	15.5211	0.5978	3.824
2	3	4	34	37	6	95	2.01125	0.7717	20	0.501333	0.0630832	0.333333	9.59722	65.4159	0.132887	0.269343	24.2265	2.379	12.2527	0.3934	2.01125
3	1	1	11	66	17	188	7.11137	1.57793	40	1.08056	0.170778	1.31	25.3316	85.9152	0.2264	0.595429	19.7859	3.0115	11.9872	0.712	7.11137
3	1	2	12	61	16	178	6.81698	1.54319	37	1.0952	0.128	0.97375	21.2725	80.4301	0.20472	0.52687	18.6748	2.6165	11.5443	0.6064	6.81698
3	1	3	13	66	17	178	7.0147	1.56687	36	1.11207	0.1169	1.3	24.2448	78.0543	0.20316	0.577301	20.198	2.7815	13.1809	0.5984	7.0147
3	1	4	14	55	12	166	6.05858	1.47446	33	0.976125	0.123625	0.985556	18.8311	76.5596	0.202609	0.49455	20.8773	2.45975	11.3482	0.6072	6.05858
3	2	1	21	59	16	164	5.88033	1.75665	31	1.1808	0.1072	0.833333	18.013	80.4598	0.20919	0.567229	20.5635	3.844	15.3989	1.13202	5.88033
3	2	2	22	54	14	146	5.2382	1.30333	29	0.706667	0.0846667	0.75	16.5282	71.1217	0.189018	0.461472	21.1506	3.04665	13.9502	0.83412	5.2382
3	2	3	23	59	12	170	5.57425	1.331	26	0.94	0.0955	0.775	15.9086	71.6012	0.207302	0.49123	20.7267	3.156	13.5757	0.8505	5.57425
3	2	4	24	47	10	136	4.81562	1.12926	27	0.698667	0.077	0.592	14.1689	63.8806	0.167235	0.41428	22.68	2.468	10.1141	0.7578	4.81562
3	3	1	31	59	14	138	5.19275	1.34223	31	0.735	0.079125	0.82	17.8683	80.9392	0.179512	0.478742	23.525	4.87465	19.229	0.623	5.19275
3	3	2	32	41	12	124	3.5795	1.07775	22	0.7248	0.0668392	0.633333	13.2289	70	0.17913	0.437053	22.977	4.17516	12.5205	0.5166	3.5795
3	3	3	33	44	12	140	3.7945	1.15358	32	0.705	0.0754014	0.65	16.1632	76.087	0.172184	0.459802	22.68	4.17065	14.0352	0.5467	3.7945
3	3	4	34	38	7	99	2.1395	0.6985	21	0.5125	0.060818	0.35	10.0444	63.8174	0.11854	0.22521	25.2044	2.2115	12.706	0.3682	2.1395
	1=Fungi+Bacteria
	2=bacteria
	3=Fungi
	4=control
	1=100% FC
	2=70% FC
	3=50% FC
